# Supplementary material
Source: PubMed Central journal article supplement (PMC3938924)
Supplement: Supp_Data.pdf [file Supp_Data.pdf]

## Supplementary Data

SUPPLEMENTARY TABLE S1. PRIMER SEQUENCES FOR REAL-TIME QUANTITATIVE POLYMERASE CHAIN REACTION

| <i>Gene</i>                               | <i>Sequence (forward)</i> | <i>Sequence (reverse)</i> |
|-------------------------------------------|---------------------------|---------------------------|
| <i>IFN<math>\alpha</math></i> (m)         | CTGCTGGCTGTGAGGACATA      | AGGAAGAGAGGGCTCTCCAG      |
| <i>IFN<math>\beta</math></i> (m)          | CCCTATGGAGATGACGGAGA      | ACCCAGTGCTGGAGAAATTG      |
| <i>IL6</i> (m)                            | TAGTCCTTCCTACCCCAATTCC    | TTGGTCCTTAGCCACTCCTC      |
| <i>ICAM1</i> (m)                          | GGCATTGTTCTCTAATGTCTCCG   | GCTCCAGGTATATCCGAGCTTC    |
| <i>TLR3</i> (m)                           | CTTGCGTTGCGAAGTGAAGAA     | CCAATTGTCTGGAAACACCCC     |
| <i>RIG-I</i> (m)                          | ATTCAGGAAGAGCCAGAGTGTC    | GTCTTCAATGATGTGCTGCAC     |
| <i>PKR</i> (m)                            | AAGCAGGAGGCAAGAAACG       | TGACAATCCACCTTGTTTTCGT    |
| <i>MDA5</i> (m)                           | CGATCCGAATGATTGATGCA      | AGTTGGTCATTGCAACTGCT      |
| <i>Flk1</i> (m)                           | GCAAAACACTCACCATTCCCA     | GAGGTTTGAAATCGACCCTCG     |
| <i>Erg</i> (m)                            | ACCTCACCCCTCAGTCCAAA      | TGGTCGGTCCCAGGATCTG       |
| <i>Fli1</i> (m)                           | ATGGACGGGACTATTAAGGAGG    | GAAGCAGTCATATCTGCCTTGG    |
| <i>GATA2</i> (m)                          | CACCCCGCCGTATTGAATG       | CCTGCGAGTCGAGATGGTTG      |
| <i>VE-cad</i> (m)                         | ATGAATCGCTGCCCCACTATG     | CATTCCCTGTGTTAGCATCGAC    |
| <i>PECAM1</i> (m)                         | TGCACCCATCACTTACCACC      | CTTCATCCACCGGGGCTATC      |
| <i>IFN<math>\beta</math></i> (h)          | CAAGTGTCCTCCAAAT          | CAGGGATGTCAAAGTTCA        |
| <i><math>\beta</math>-actin</i> (h and m) | CATGTACGTAGCCATCCAGGC     | CTCTTTGATGTCACGCACGAT     |

h, human; m, mouse.
